# Supplementary material for: Surface faceting and elemental diffusion behaviour at atomic scale for alloy nanoparticles during in situ annealing
Source: PubMed Central journal article supplement (PMC4673855; doi:10.1038/ncomms9925), 2015-11-18
Supplement: ncomms9925-s1.pdf [file ncomms9925-s1.pdf]

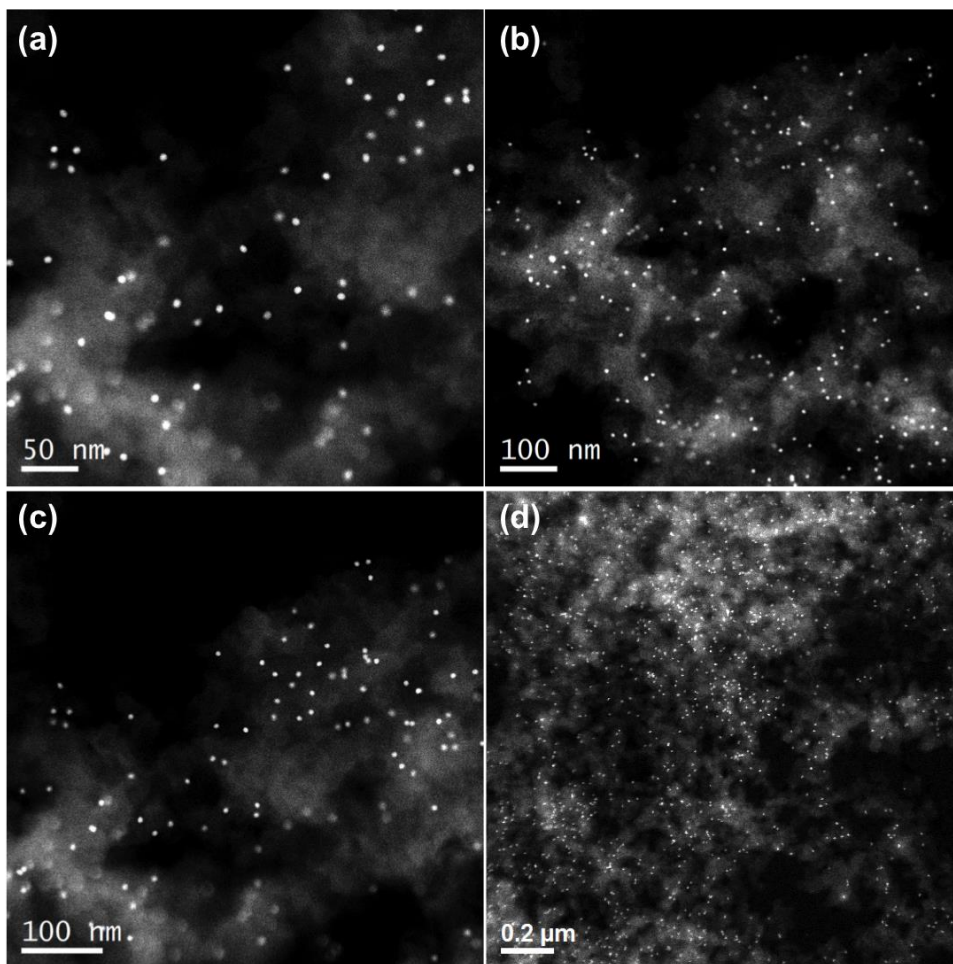

Supplementary Figure 1. (a)-(d) HAADF images of pristine Pt<sub>3</sub>Co NPs show excellent size homogeneity and monodispersivity on supporting carbon.

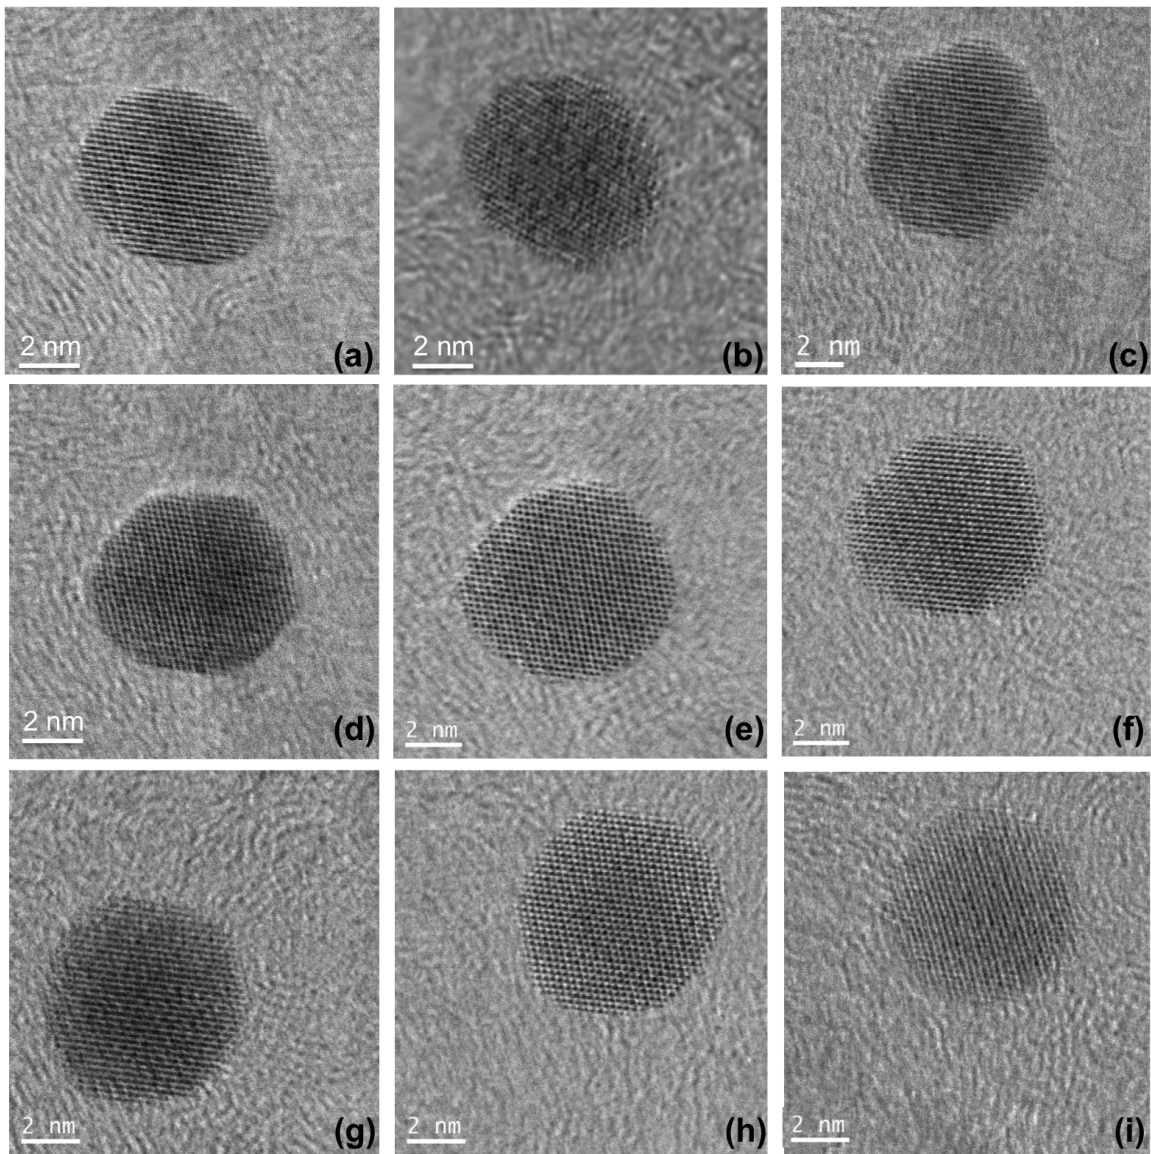

Supplementary Figure 2. Atomic-resolution bright-field (BF) STEM images of the single  $\text{Pt}_3\text{Co}$  NP that were acquired simultaneously with the HAADF-STEM images in Fig. 2.

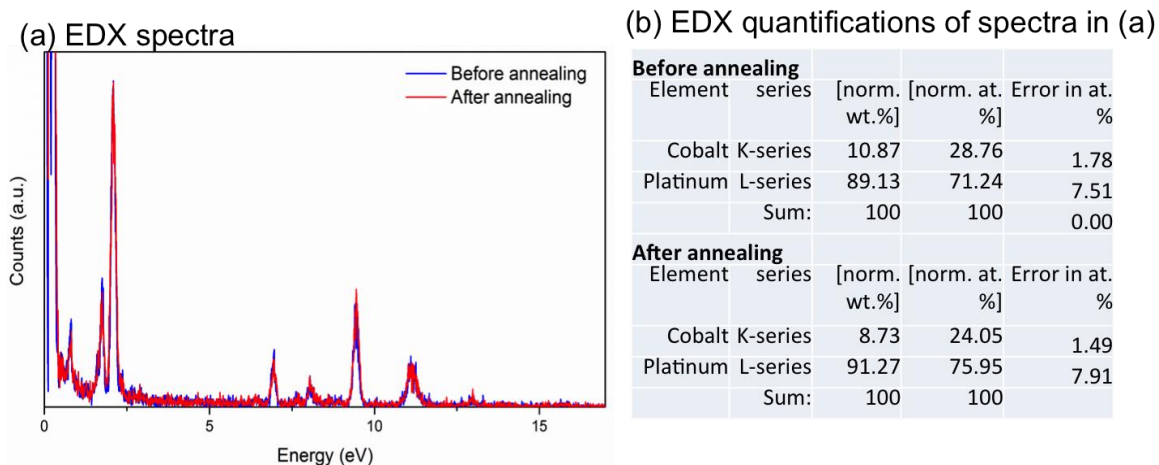

Supplementary Figure 3. Energy-dispersive X-ray spectra of the NP in Fig. 2 pre- and post-annealing. Both spectra were acquired at RT; the post-annealing spectrum was acquired after the particle was quenched from 800°C to RT. Both the spectra (a) and the corresponding elemental quantification (b) show no detectable chemical loss on the NP.

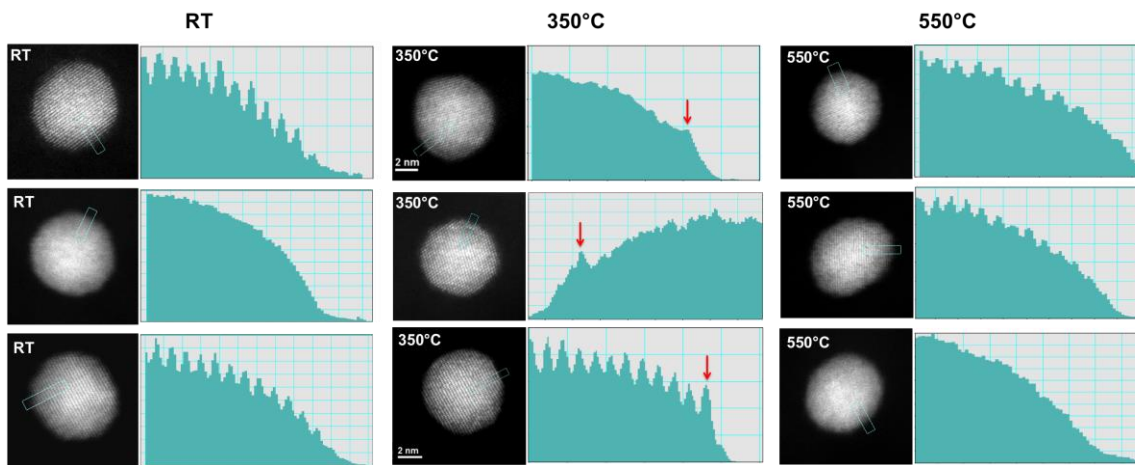

Supplementary Figure 4. Additional representative Pt<sub>3</sub>Co NPs showed the same segregation behavior at different annealing temperatures as exhibited by the particle in Figs. 2 and 3. The enhanced contrast at the surface region was observed on the 350°C annealed particles, as marked by arrows on the profiles.

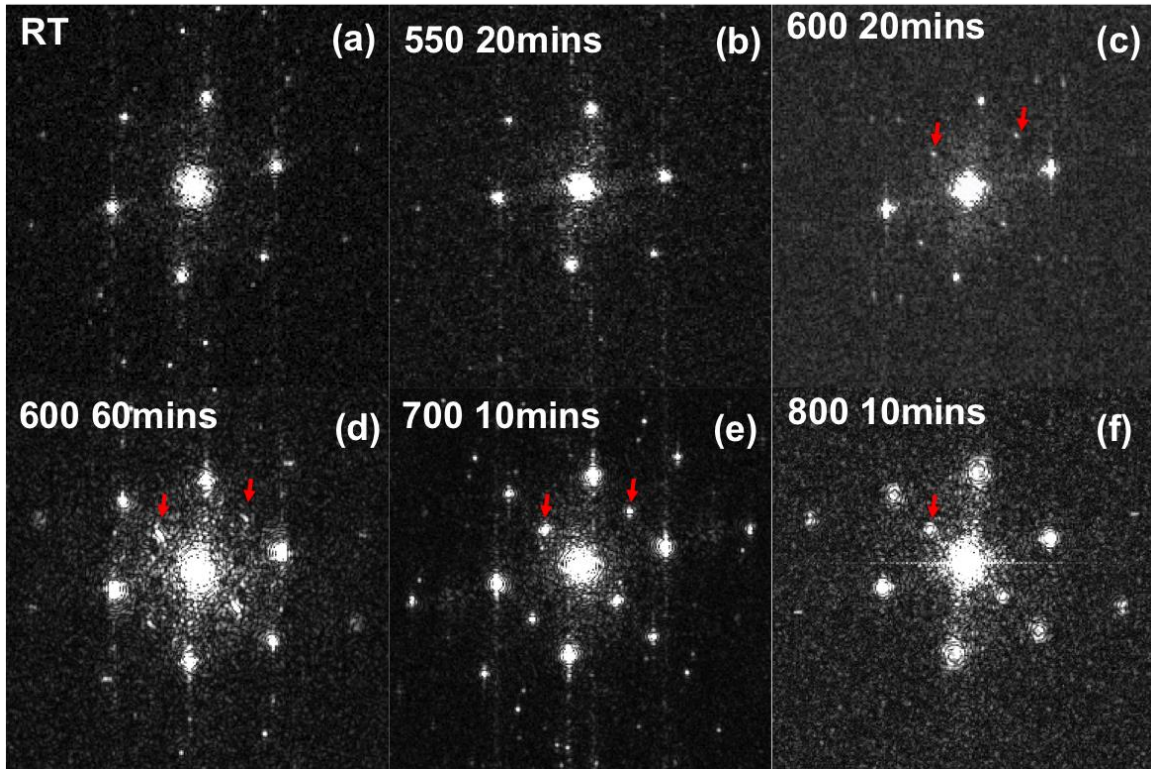

Supplementary Figure 5. Fast Fourier transforms computed from selected high-resolution images in Fig. 2. The representative ordering periodicities  $\frac{1}{2}\{001\}$  and  $\frac{1}{2}\{011\}$  are indicated by arrows.

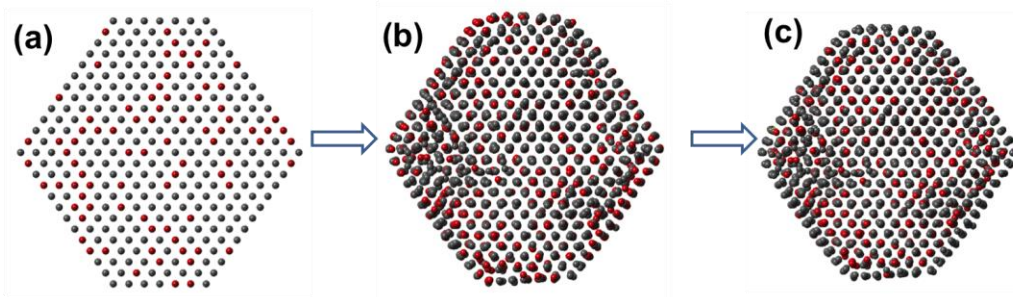

Supplementary Figure 6. calculated structural models of Pt<sub>3</sub>Co NPs for multi-slice STEM image simulations: randomly alloyed NP in a cubo-octahedron shape (a); after structural relaxation (b); and with Pt segregation (c).

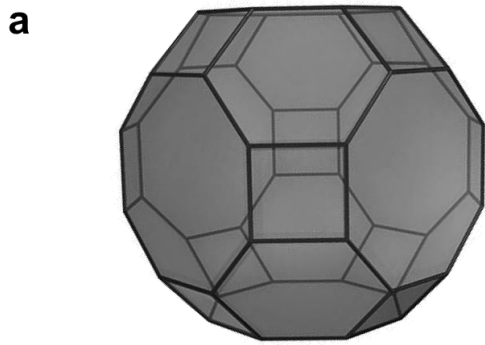

3-D model of truncated cubooctahedron

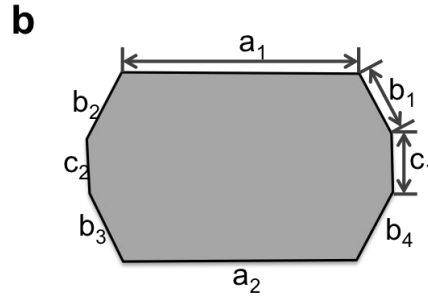

2-D projection at [110], and the edges for the calculation were labeled.

**c**

|         |                                                                                     |                                                        |           |
|---------|-------------------------------------------------------------------------------------|--------------------------------------------------------|-----------|
| 12X 110 |    | $S_{(110)} = 4(xy + yz + xz)$                          | ..... (1) |
| 8X 111  |    | $S_{(111)} = 8 \times 3 \times \frac{\sqrt{3}}{2} y^2$ | ..... (2) |
| 6X 100  |  | $S_{(100)} = 3[(1 + 2\sqrt{2})(a^2 + c^2) + ab + ac]$  | ..... (3) |
|         |                                                                                     | $x = \frac{a}{(1 + \sqrt{2})}$                         | ..... (4) |
|         |                                                                                     | $y = b$                                                | ..... (5) |
|         |                                                                                     | $z = \frac{c}{(1 + \sqrt{2})}$                         | ..... (6) |

Supplementary Figure 7. Schematic of facets and calculation equations that are used for estimating enclosing facet area of the NP. The 3D schematic model of truncated cubooctahedron (a) and its 2-D projection at [110] direction (b); the lengths of  $a_i$ ,  $b_i$ , and  $c_i$  ( $i=1,2,3\dots$ ) are measured from STEM images for facet evaluations. A truncated cubo-octahedron contains  $8X\{111\}$ ,  $6X\{100\}$  and  $12X\{110\}$  facets (c).  $x$ ,  $y$ , and  $z$  are

the side lengths of the (100) facets, and a, b, and c are the averages from the measured  $a_i$ ,  $b_i$ , and  $c_i$  values respectively. The area of surface facets are calculated using equation (1)-(3), and the mathematic relationship between x, y, z and a, b, c are shown in equation (4)-(6).

Supplementary Table 1. Microscopy parameters for image simulation

| <b>Voltage<br/>(kV)</b> | <b>Conver<br/>gent<br/>angle</b> | <b>C1</b> | <b>A1</b>  | <b>A2</b>  | <b>B2</b>  | <b>C3</b>   | <b>A3</b>   | <b>A4</b> |
|-------------------------|----------------------------------|-----------|------------|------------|------------|-------------|-------------|-----------|
| 200                     | 30 mrad                          | 700<br>pm | 2.22<br>nm | 35.5<br>nm | 30.4<br>nm | 100.1<br>nm | 264.7<br>nm | 8.1<br>um |
